# Supplementary material for: Einschätzungen zur Prävalenz mikrovaskulärer Folgeerkrankungen bei Diabetes mellitus in Deutschland. Analyse von Versichertendaten aller gesetzlichen Krankenkassen für die Jahre 2012 und 2013
Source: Springer Nature journal article supplement (doi:10.1007/s00103-020-03211-x), 2020-09-02
Supplement: MOESM1 [file 18341714]

Elektronisches Zusatzmaterial zum Beitrag:

**Einschätzungen zur Prävalenz mikrovaskulärer Folgeerkrankungen bei Diabetes mellitus in Deutschland. Analyse von Versichertendaten aller gesetzlichen Krankenkassen für die Jahre 2012 und 2013**

Lukas Reitzle<sup>1</sup>, Christian Schmidt<sup>1</sup>, Yong Du<sup>1</sup>, Andrea Icks<sup>2,3</sup>, Bernd Hagen<sup>4</sup>, Thomas Ziese<sup>1</sup>,  
Christa Scheidt-Nave<sup>1</sup>

<sup>1</sup> Abteilung für Epidemiologie und Gesundheitsmonitoring, Robert Koch-Institut, Berlin, Deutschland

<sup>2</sup> Institut für Versorgungsforschung und Gesundheitsökonomie, Deutsches Diabetes-Zentrum, Deutsche Diabetes Forschungsgesellschaft e.V., Düsseldorf, Deutschland

<sup>3</sup> Institut für Versorgungsforschung und Gesundheitsökonomie, Centre for Health and Society, Medizinische Fakultät, Heinrich-Heine-Universität Düsseldorf, Düsseldorf, Deutschland

<sup>4</sup> Zentralinstitut für die kassenärztliche Versorgung in Deutschland, Köln, Deutschland

**Korrespondenzadresse**

Dr. Lukas Reitzle  
Robert Koch-Institut  
Abteilung für Epidemiologie und Gesundheitsmonitoring  
General-Pape-Str. 62-66  
12101 Berlin  
reitzlel@rki.de

Inhalt:

**SQL-Skript am Beispiel Niereninsuffizienz im Jahr 2012**

## SQL-Skript am Beispiel Niereninsuffizienz im Jahr 2012

### Schritt 1

Tabelle mit Personen aller gesetzlichen Krankenversicherungen im Jahr 2012, die mindestens 360 Tage im Jahr versichert sind, keinen Wohnsitz im Ausland haben, keine Selbstzahlung von Gesundheitsleistungen vorgenommen haben und keine Geschlechts- bzw. Geburtsjahresinkonsistenzen aufweisen.

```
CREATE TABLE NENNER_2012
AS
SELECT
  a.SA151_BERICHTSJAHR
  ,a.SA151_PSID
  ,COUNT(a.SA151_PSID) as SA151_PSID_CNT
  ,MAX(A.SA151_GESCHLECHT) as SA151_GESCHLECHT
  ,MAX(A.SA151_GEBURTSJAHR) as SA151_GEBURTSJAHR
FROM DATRAV.V2012SA151 a
INNER JOIN DATRAV.V2013SA152 b
  ON a.SA151_PSID=b.SA152_PSID
  AND a.SA151_BERICHTSJAHR = b.SA152_BERICHTSJAHR
  AND a.SA151_BERICHTSJAHR=2012
GROUP BY a.SA151_BERICHTSJAHR
  ,a.SA151_PSID
HAVING MAX(b.SA152_VERSICHERTENTAGE53IV)=0
  AND MAX (b.SA152_VERSICHERTENTAGE13II)=0
  AND MAX (b.SA152_VERSICHERTENTAGEAUSLAND)=0
  AND MAX (a.SA151_VERSICHERTENTAGE)>=360
  AND COUNT(DISTINCT a.SA151_GESCHLECHT)=1
  AND COUNT(DISTINCT a.SA151_GEBURTSJAHR)=1;
```

### Schritt 2

Tabelle mit Personen, die mindestens eine ambulante Diabetesdiagnose (E10-E14) gesichert dokumentiert(G) aufweisen.

```
CREATE TABLE DIAB_AMB
AS
SELECT
  d.SA151_BERICHTSJAHR
  ,d.SA151_PSID
  ,d.SA151_GESCHLECHT
  ,d.SA151_GEBURTSJAHR,
  COUNT(DISTINCT A.SA651_LEISTUNGSQUARTAL) as ZAHL
FROM DATRAV.V2013SA651 a
INNER JOIN NENNER_2012 d
  ON a.SA651_PSID = d.SA151_PSID
  AND a.SA651_BERICHTSJAHR = d.SA151_BERICHTSJAHR
  AND d.SA151_BERICHTSJAHR=2012
WHERE SUBSTR(a.SA651_ICD_CODE,1,3) IN('E10','E11','E12','E13','E14')
  AND (a.SA651_QUALIFIZIERUNG IN ('G'))
GROUP BY d.SA151_BERICHTSJAHR
  ,d.SA151_PSID
  ,d.SA151_GESCHLECHT
  ,d.SA151_GEBURTSJAHR
ORDER BY ZAHL DESC;
```

### Schritt 3

Tabelle der ambulanten Diabetesprävalenz (m2Q-Kriterium)

```
CREATE TABLE DIAB_AMB_M2Q
AS
SELECT
  SA151_PSID
  ,SA151_GESCHLECHT
  ,SA151_GEBURTSJAHR
  ,SA151_BERICHTSJAH
  ,ZAHL
FROM DIAB_AMB
GROUP BY SA151_PSID
  ,SA151_GESCHLECHT
  ,SA151_GEBURTSJAHR
  ,SA151_BERICHTSJAH
  ,ZAHL
HAVING (ZAHL)>1;
```

### Schritt 4

Tabelle mit Personen, die mindestens eine Diagnose Diabetes im stationären Sektor aufweisen

```
CREATE TABLE DIAB_STAT
AS
SELECT
  d.SA151_BERICHTSJAH
  ,d.SA151_PSID
  ,d.SA151_GESCHLECHT
  ,d.SA151_GEBURTSJAHR
FROM DATRAV.V2013SA551 a
INNER JOIN NENNER_2012 d
  ON a.SA551_PSID = d.SA151_PSID
  AND a.SA551_BERICHTSJAH = d.SA151_BERICHTSJAH
  AND d.SA151_BERICHTSJAH=2012
WHERE SUBSTR(A.SA551_ICD_CODE,1,3) IN('E10','E11','E12','E13','E14')
  AND d.SA151_PSID NOT IN (SELECT SA151_PSID FROM DIAB_AMB_M2Q)
GROUP BY d.SA151_BERICHTSJAH
  ,d.SA151_PSID
  ,d.SA151_GESCHLECHT
  ,d.SA151_GEBURTSJAHR;
```

### Schritt 5

Tabelle der Diabetesprävalenz (ambulant und stationär)

```
CREATE TABLE DIABETES_PRÄV
AS
SELECT
SA151_BERICHTSJAHR
, SA151_PSID
, SA151_GESCHLECHT
, SA151_GEBURTSJAHR
FROM DIAB_AMB_M2Q
UNION
SELECT
SA151_BERICHTSJAHR
, SA151_PSID
, SA151_GESCHLECHT
, SA151_GEBURTSJAHR
FROM DIAB_STAT;
```

### Schritt 6

Tabelle ambulanter chronischer Niereninsuffizienz bei Diabetes

```
CREATE TABLE NIERENERKRANKUNG_AMB
AS
SELECT DISTINCT
d.SA151_BERICHTSJAHR
, d.SA151_PSID
, d.SA151_GESCHLECHT
, d.SA151_GEBURTSJAHR
, a.SA651_QUALIFIZIERUNG
FROM DATRAV.V2013SA651 a
INNER JOIN NENNER_2012 d
ON a.SA651_PSID = d.SA151_PSID
AND a.SA651_BERICHTSJAHR = d.SA151_BERICHTSJAHR
AND d.SA151_BERICHTSJAHR=2012
WHERE SUBSTR(a.SA651_ICD_CODE,1,3) IN ('N18')
AND (a.SA651_PSID) IN (SELECT SA151_PSID FROM DIABETES_PRÄV)
GROUP BY d.SA151_BERICHTSJAHR
, d.SA151_PSID
, d.SA151_GESCHLECHT
, d.SA151_GEBURTSJAHR
, a.SA651_QUALIFIZIERUNG
, a.SA651_ICD_CODE
HAVING a.SA651_QUALIFIZIERUNG='G';
```

### Schritt 7

Tabelle stationärer chronischer Niereninsuffizienz bei Diabetes

```
CREATE TABLE NIERENERKRANKUNG_STAT
AS
SELECT DISTINCT
  d.SA151_BERICHTSJAHR
  ,d.SA151_PSID
  ,d.SA151_GESCHLECHT
  ,d.SA151_GEBURTSJAHR
FROM DATRAV.V2013SA551 a
INNER JOIN NENNER_2012 d
  ON a.SA551_PSID = d.SA151_PSID
  AND a.SA551_BERICHTSJAHR = d.SA151_BERICHTSJAHR
  AND d.SA151_BERICHTSJAHR=2012
WHERE SUBSTR(a.SA551_ICD_CODE,1,3) IN ('N18')
  AND (a.SA551_PSID) IN (SELECT SA151_PSID FROM DIABETES_PRÄV)
GROUP BY d.SA151_BERICHTSJAHR
  ,d.SA151_PSID
  ,d.SA151_GESCHLECHT
  ,d.SA151_GEBURTSJAHR
  ,a.SA551_ICD_CODE;
```

### Schritt 8

Tabelle ambulanter oder stationärer chronischer Niereninsuffizienz bei Diabetes

```
CREATE TABLE NIERENERKRANKUNG
AS
SELECT
  SA151_PSID
  ,SA151_GESCHLECHT
  ,SA151_GEBURTSJAHR
FROM NIERENERKRANKUNG_AMB
UNION
SELECT
  SA151_PSID
  ,SA151_GESCHLECHT
  ,SA151_GEBURTSJAHR
FROM NIERENERKRANKUNG_STAT;
```

### Schritt 9

Tabelle mit chronischer Niereninsuffizienz bei Diabetes nach Altersgruppen

```
CREATE TABLE NIERENERKRANKUNG_ALTERSGRUPPEN
AS
SELECT DISTINCT
  SA151_PSID
  ,SA151_GESCHLECHT as GESCHLECHT
  ,SA151_GEBURTSJAHR
  ,CASE WHEN (2012-SA151_GEBURTSJAHR) BETWEEN 0 AND 17 THEN 1
    WHEN (2012-SA151_GEBURTSJAHR) BETWEEN 18 AND 24 THEN 2
    WHEN (2012-SA151_GEBURTSJAHR) BETWEEN 25 AND 29 THEN 3
    WHEN (2012-SA151_GEBURTSJAHR) BETWEEN 30 AND 34 THEN 4
    WHEN (2012-SA151_GEBURTSJAHR) BETWEEN 35 AND 39 THEN 5
    WHEN (2012-SA151_GEBURTSJAHR) BETWEEN 40 AND 44 THEN 6
    WHEN (2012-SA151_GEBURTSJAHR) BETWEEN 45 AND 49 THEN 7
    WHEN (2012-SA151_GEBURTSJAHR) BETWEEN 50 AND 54 THEN 8
    WHEN (2012-SA151_GEBURTSJAHR) BETWEEN 55 AND 59 THEN 9
    WHEN (2012-SA151_GEBURTSJAHR) BETWEEN 60 AND 64 THEN 10
    WHEN (2012-SA151_GEBURTSJAHR) BETWEEN 65 AND 69 THEN 11
    WHEN (2012-SA151_GEBURTSJAHR) BETWEEN 70 AND 74 THEN 12
    WHEN (2012-SA151_GEBURTSJAHR) BETWEEN 75 AND 79 THEN 13
    WHEN (2012-SA151_GEBURTSJAHR) BETWEEN 80 AND 84 THEN 14
    WHEN (2012-SA151_GEBURTSJAHR) BETWEEN 85 AND 89 THEN 15
    WHEN (2012-SA151_GEBURTSJAHR) BETWEEN 90 AND 94 THEN 16
    ELSE 17
  END AS ALTERSGRUPPE
  ,COUNT(DISTINCT SA151_PSID) as PSID_CNT
  ,COUNT(*) as ROW_CNT
FROM NIERENERKRANKUNG
GROUP BY SA151_PSID
  ,SA151_GESCHLECHT
  ,SA151_GEBURTSJAHR;
```

### Schritt 10

Die Ergebnisse aus Schritt 9 werden über die Altersgruppen und nach Geschlecht aggregiert.

```
CREATE TABLE PRÄVALENZ_NIERENERKRANKUNGEN_2012
AS
SELECT
  GESCHLECHT
  ,ALTERSGRUPPE
  ,SUM(PSID_CNT) as PSID_CNT
  ,SUM(ROW_CNT) as ROW_CNT
FROM NIERENERKRANKUNG_ALTERSGRUPPEN
GROUP BY GESCHLECHT
  ,ALTERSGRUPPE
ORDER BY ALTERSGRUPPE;
```
